## CORRIGENDUM

Je-Yeon Yun, Premika S.W. Boedhoe, Chris Vriend, Neda Jahanshad, Yoshinari Abe, Stephanie H. Ameis, Alan Anticevic, Paul D. Arnold, Marcelo C. Batistuzzo, Francesco Benedetti, Jan C. Beucke, Irene Bollettini, Anushree Bose, Silvia Brem, Anna Calvo, Yuqi Cheng, Kang Ik K. Cho, Valentina Ciullo, Sara Dallspezia, Damiaan Denys, Jamie D. Feusner, Jean-Paul Fouché, Mònica Giménez, Patricia Gruner, Derrek P. Hibar, Marcelo Q. Hoexter, Hao Hu, Chaim Huyser, Keisuke Ikari, Norbert Kathmann, Christian Kaufmann, Kathrin Koch, Luisa Lazaro, Christine Lochner, Paulo Marques, Rachel Marsh, Ignacio Martínez-Zalacaín, David Mataix-Cols, José M. Menchón, Luciano Minuzzi, Pedro Morgado, Pedro Moreira, Takashi Nakamae, Tomohiro Nakao, Janardhanan C. Narayanaswamy, Erika L. Nurmi, Joseph O'Neill, John Piacentini, Fabrizio Piras, Federica Piras, Y.C. Janardhan Reddy, Joao R. Sato, H. Blair Simpson, Noam Soreni, Carles Soriano-Mas, Gianfranco Spalletta, Michael C. Stevens, Philip R. Szeszko, David F. Tolin, Ganesan Venkatasubramanian, Susanne Walitza, Zhen Wang, Guido A. van Wingen, Jian Xu, Xiufeng Xu, Qing Zhao, ENIGMA-OCD working group, Paul M. Thompson, Dan J. Stein, Odile A. van den Heuvel, Jun Soo Kwon. Brain structural covariance networks in obsessive-compulsive disorder: a graph analysis from the ENIGMA Consortium. *Brain* 2020; 143: 684–700. doi:10.1093/brain/awaa001.

The authors apologize for misspelling the first name of the author Erika L. Nurmi. This has now been corrected.
